# Supplementary material for: FLEXPART version 11: improved accuracy, efficiency, and flexibility
Source: Copernicus journal article supplement (doi:10.5194/gmd-17-7595-2024), 2024-10-30
Supplement: Supplementary file 1 [file gmd-17-7595-2024-supplement.zip]

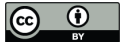

## *Supplement of*

# **FLEXPART version 11: improved accuracy, efficiency, and flexibility**

**Lucie Bakels et al.**

*Correspondence to:* Lucie Bakels ([lucie.bakels@univie.ac.at](mailto:lucie.bakels@univie.ac.at))

- [gmd-17-7595-2024-supplement-title-page.pdf](#)
- [Simulation\\_and\\_Analysis](#)
  - [Figure1](#)
    - \* [ATCEtrajectories.zip](#)
    - \* [CreateData](#)
    - \* [PlotData](#)
    - \* [ProcessData](#)
    - \* [README](#)
  - [Figure2](#)
    - \* [CreateData](#)
    - \* [PlotData](#)
    - \* [ProcessData](#)
    - \* [README](#)
  - [Figure3](#)
    - \* [CreateData](#)
    - \* [README](#)
  - [Figure4](#)
    - \* [CreateData](#)
    - \* [PlotData](#)
    - \* [README](#)
  - [Figure5](#)
    - \* [coastfine.mat](#)
    - \* [cs137.py](#)
    - \* [processed\\_test](#)
    - \* [processed\\_test-20240604T172224Z-001.zip](#)
    - \* [ratio\\_cs.py](#)
    - \* [ratio\\_cs\\_137\\_xw\\_133\\_short\\_x\\_Lucie.m](#)
    - \* [special\\_colors.ctb](#)

- \* test\_read\_flexpart\_netcdf\_cs137\_newruns\_twolayers\_x\_lucie.m
  - \* test\_read\_flexpart\_netcdf\_xe133\_nodecaycorr\_two\_layers\_x\_lucie.m
- Figure6
  - \* CreateData
  - \* PlotData
  - \* README
- Figure7
  - \* Figure7\_plotting.py
  - \* README
- Figure8
  - \* Figure8\_plotting.py
  - \* README
- Figure9
  - \* ESACCI-GHG-L2-CH4-CO-TROPOMI-WFMD-20200101-fv3.nc
  - \* grid\_time\_20200201070000.nc
  - \* partic\_20200201.nc
  - \* plot4paper.ipynb
  - \* satellitefootprint.png

The copyright of individual parts of the supplement might differ from the article licence.
